# Supplementary material for: High-content ductile coherent nanoprecipitates achieve ultrastrong high-entropy alloys
Source: PubMed Central journal article supplement (PMC6170471; doi:10.1038/s41467-018-06600-8), 2018-10-03
Supplement: 41467_2018_6600_MOESM1_ESM.pdf [file 41467_2018_6600_MOESM1_ESM.pdf]

## **Supplementary Information**

### **High-content ductile coherent nanoprecipitates achieve ultrastrong high-entropy alloys**

Liang et al.

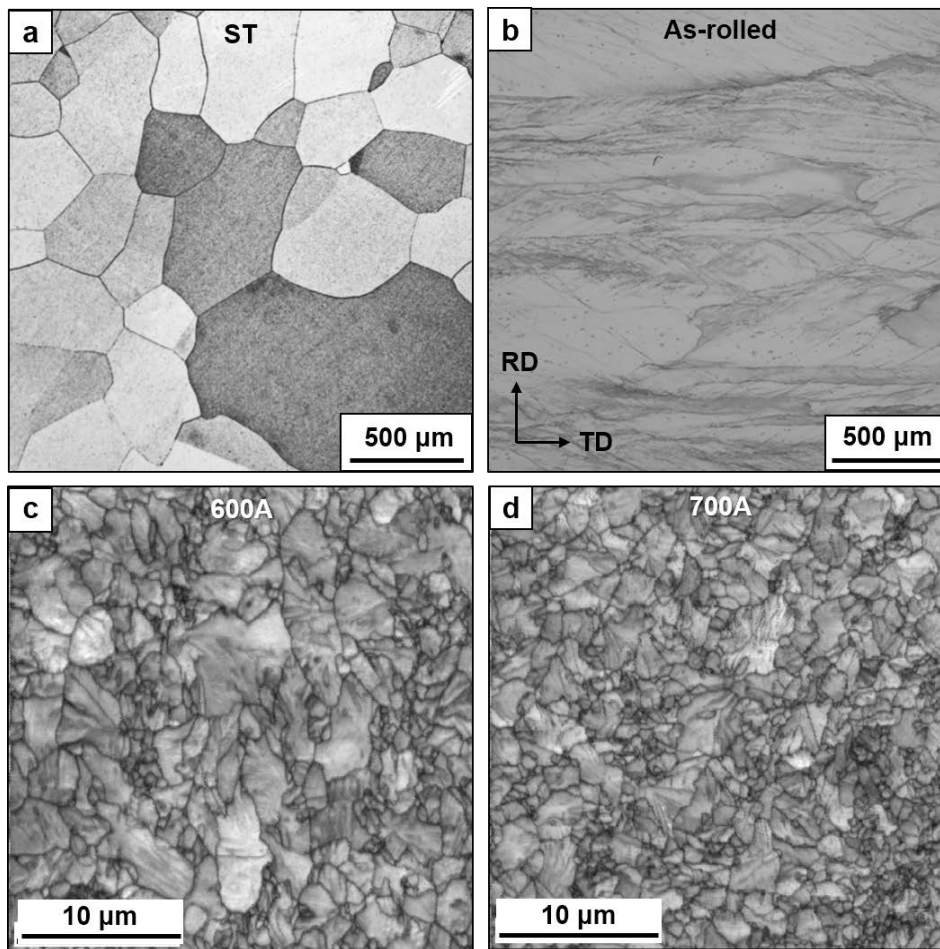

**Supplementary Figure 1 | Grain morphologies of the current HEA produced under various processing conditions. a,** Homogenized and coarse equiaxed FCC grains forming after solution treatment. **b,** FCC grains were elongated after 72% cold-rolling. **c,d,** Fine recrystallization grains obtained by ageing for 1 h at 600°C and 700°C after cold-rolling, respectively.

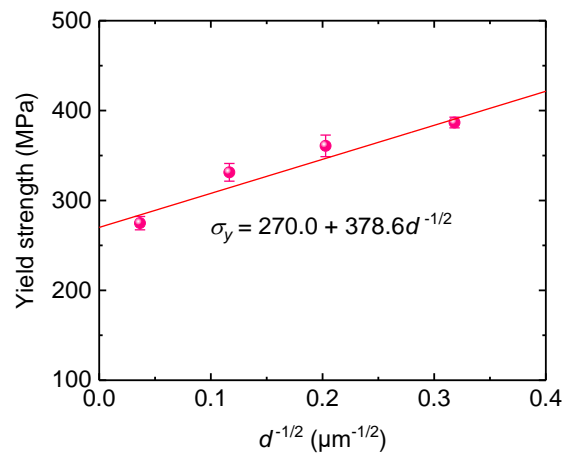

**Supplementary Figure 2 | Strengthening by lattice friction stress, solute atoms, and grain boundaries.** For a fixed alloy, the intercept term  $\sigma_0$  in the Hall–Petch equation ( $\sigma_y = \sigma_0 + k_g \cdot d^{-0.5}$ , where  $k_g$  is the Hall–Petch coefficient) is considered an alloy constant composed of solution strengthening  $\Delta\sigma_{ss}$  and lattice friction stress  $\sigma_{fs}$ . Linear fitting of the plot of the YS  $\sigma_y$  of single-phase FCC alloys versus the inverse of the square root of grain size  $d$  with the Hall–Petch equation can estimate the strengthening effects of these mechanisms experimentally. Error bars, s.d..

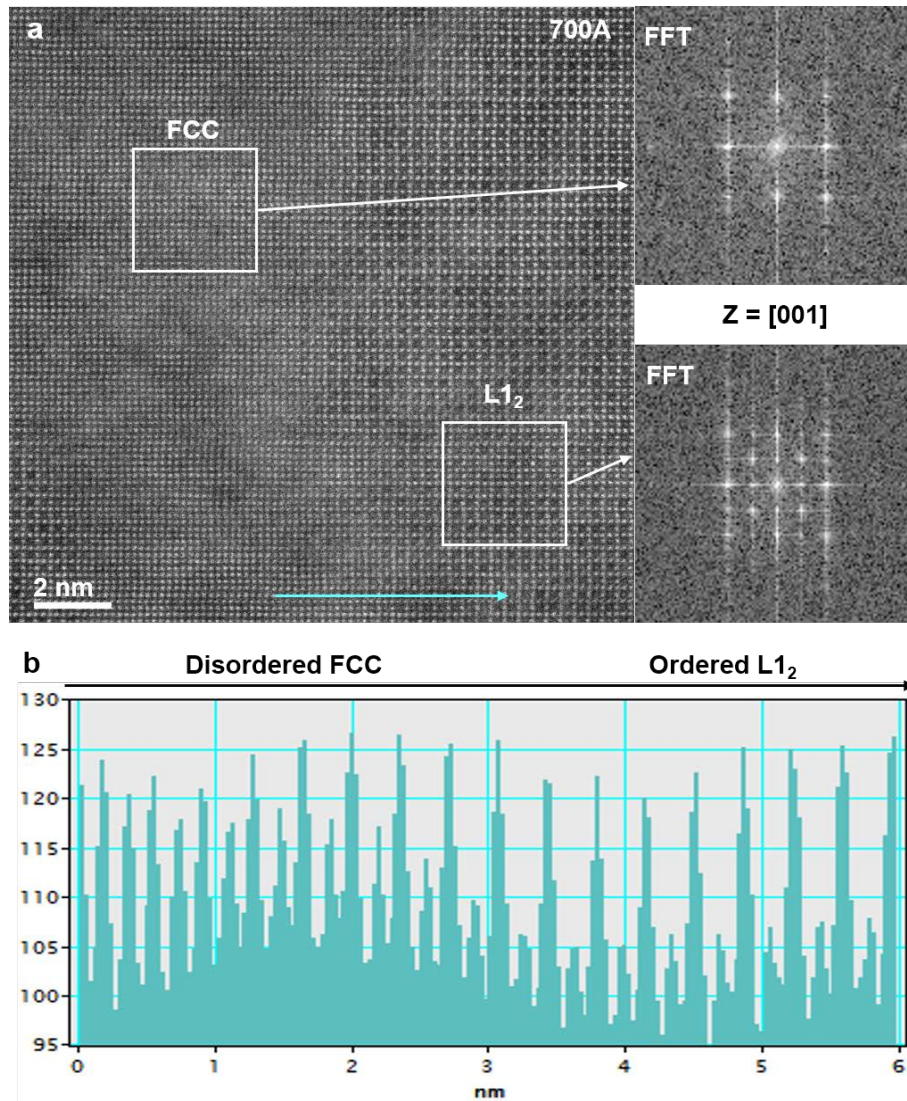

**Supplementary Figure 3 | Structure of the phases existing in 700A. a,** Atomic mass contrast in atomic-resolution HAADF-STEM images of 700A showing the nanostructure consisting of a disordered FCC matrix and ordered L<sub>12</sub> phases with diffuse coherent interfaces. **b,** Intensity profile along the cyan arrow marked in **a** showing atomic arrangement in the two phases.

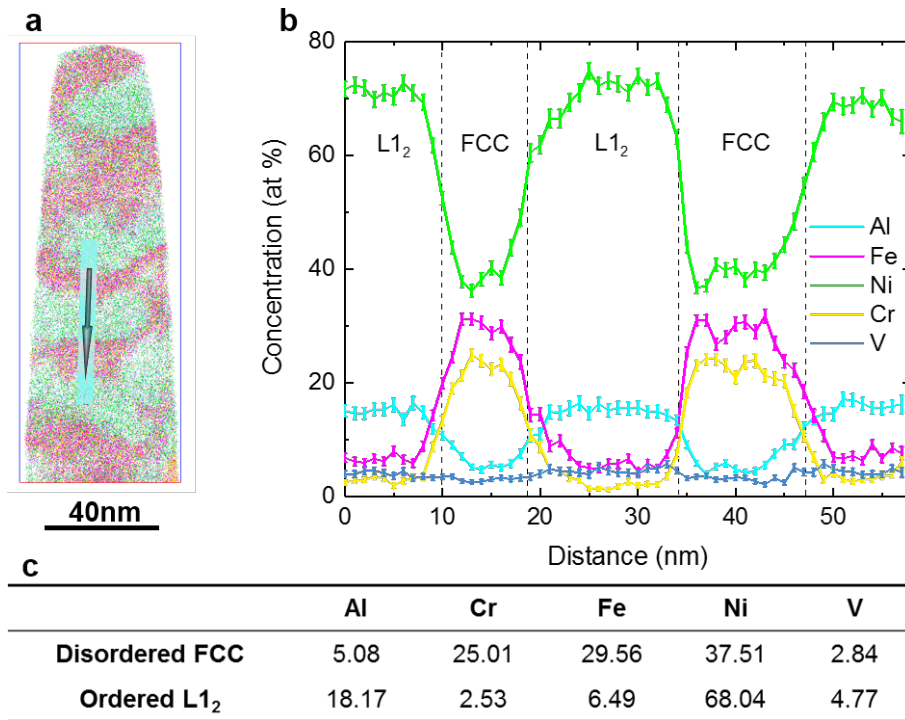

**Supplementary Figure 4 | Atom probe analysis of the element distribution and composition in the spinodal order-disorder nanostructure. a,** Three-dimensional reconstruction of atomic distributions in a thin slice with a thickness of 10 nm. **b,** One-dimensional concentration profiles (sampling region and direction marked in **a**) demonstrating long-range periodic composition fluctuations without abrupt changes in composition. Error bars, s.d.. **c,** Mean compositions (in at%) of the disordered FCC matrix and ordered L<sub>12</sub> nanoprecipitates.

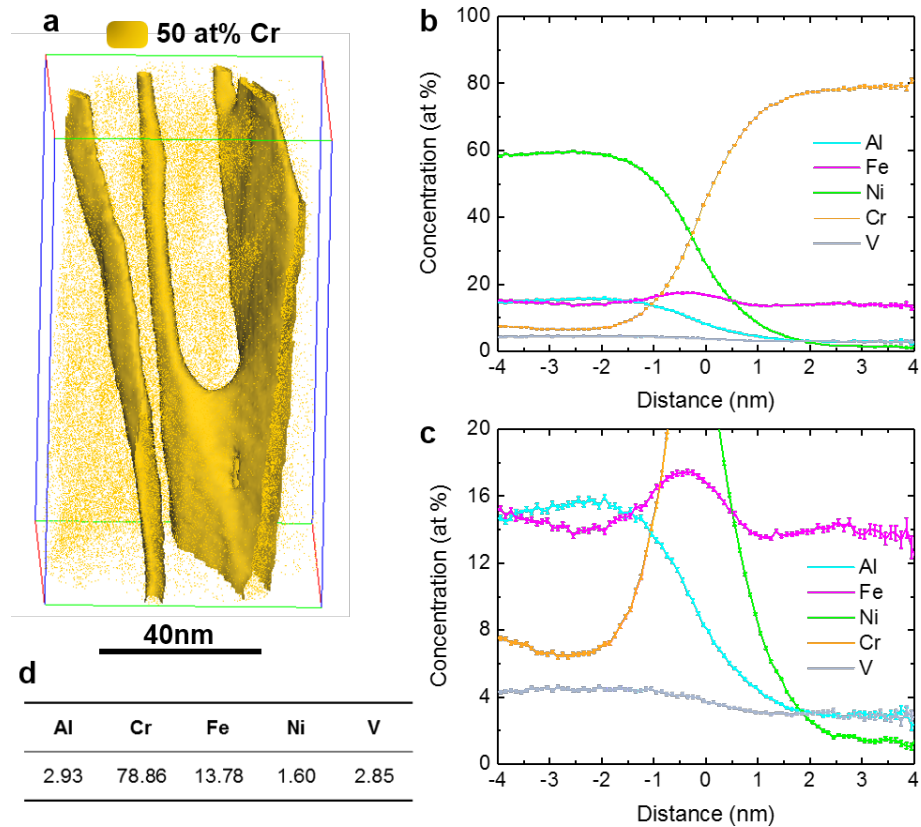

**Supplementary Figure 5 | Atom probe analysis of the composition and morphology of the BCC phases.** **a**, Three-dimensional reconstruction of 50 at% Cr isoconcentration surfaces showing the morphology of the BCC phases. **b**, Proximity histogram presenting the element distributions in vicinity of the 50 at% Cr isoconcentration surfaces. Error bars, s.d.. **c**, Corresponding close-up histogram of **b** revealing that Fe element is enriches at the interfaces. Error bars, s.d.. **d**, Mean composition (in at%) of the BCC phases.



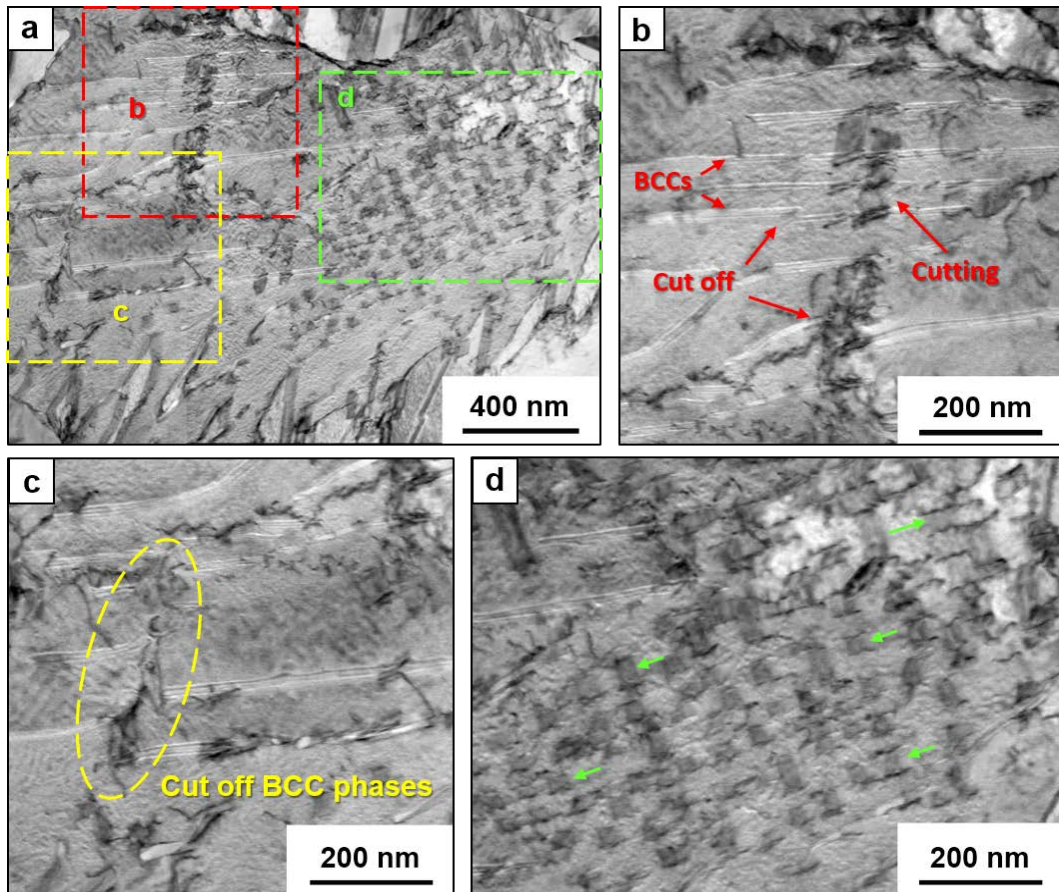

**Supplementary Figure 6 | Bright field (BF) STEM images of the 600A sample after tensile deformation. a,** Interaction between the precipitates and dislocations. **b,c,** High-magnification images revealing that dislocations shear and pass through the BCC phases. **d,** Numerous coupled dislocations existing in FCC + L12 region.

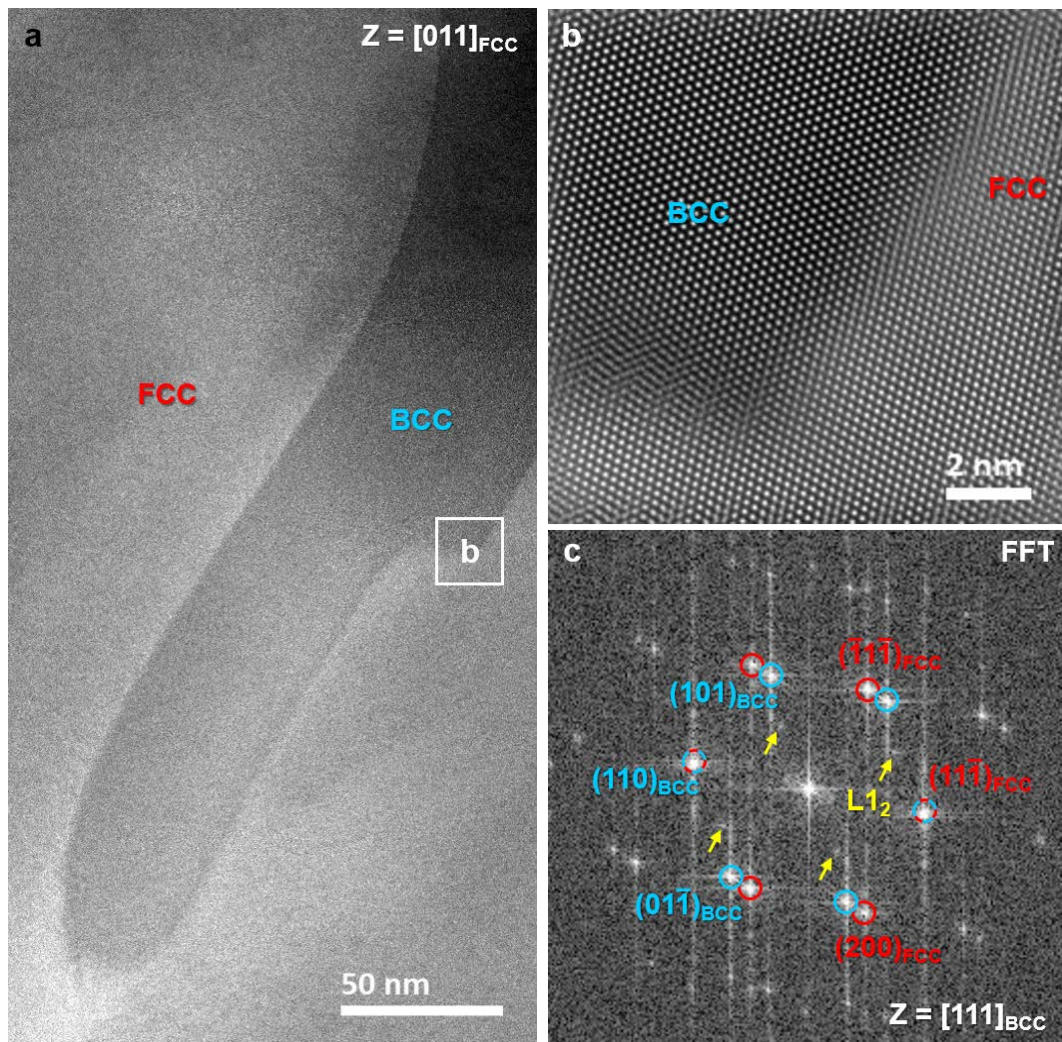

**Supplementary Figure 7 | Interfacial structure and orientation relationship between the BCC precipitates and FCC+L1<sub>2</sub> matrix.** **a**, HAADF-STEM images showing the morphology of a BCC phase. **b**, Atomic-resolution HAADF-STEM images of the region marked by the white box in **a** showing a semi-coherent precipitate-matrix interface. **c**, FFT of **b** showing that two orientation relationships,  $[\bar{1}11]_{\text{BCC}}//[011]_{\text{FCC}}$  and  $(110)_{\text{BCC}}//(11\bar{1})_{\text{FCC}}$ , exist between the precipitate and matrix.



**Supplementary Table 1 | Compositions, processing, microstructure, and tensile properties of the HEAs studied previously.**

| Systems                                                   | Alloys                                                    | Processing <sup>a</sup>                                   | Microstructure <sup>a</sup>                               | $\dot{\epsilon}$ (s <sup>-1</sup> )       | $\sigma_y$ (MPa)                        | $\sigma_{uts}$ (MPa) | $\epsilon$ (%)  | Ref. |      |   |
|-----------------------------------------------------------|-----------------------------------------------------------|-----------------------------------------------------------|-----------------------------------------------------------|-------------------------------------------|-----------------------------------------|----------------------|-----------------|------|------|---|
| AlCoCrCuFeNi                                              | AlCoCrCuFeNi                                              | AC                                                        | BCC+2FCC                                                  | $1 \times 10^{-3}$                        | 790                                     | 790                  | 0.2             | 1    |      |   |
|                                                           |                                                           | AC + 960°C/50h + multi-step forged at 950°C (1000%)       | BCC+2FCC+ $\sigma$                                        | $1 \times 10^{-3}$                        | 1040                                    | 1170                 | 1               | 1    |      |   |
| Al <sub>0.5</sub> CoCrCuFeNi                              | Al <sub>0.5</sub> CoCrCuFeNi                              | AC                                                        | 2FCC                                                      | $8 \times 10^{-4}$                        | 359                                     | 707                  | 19              | 2    |      |   |
|                                                           |                                                           | AC                                                        | 2FCC                                                      | $1 \times 10^{-3}$                        | 578.7                                   | 895                  | 10.7            | 3    |      |   |
|                                                           |                                                           | AC + 600°C/24h/WQ                                         | FCC+BCC                                                   | $1 \times 10^{-3}$                        | 663.8                                   | 1002                 | 8.1             | 3    |      |   |
|                                                           |                                                           | AC + 1000°C/6h/WQ + CR (80%)                              | 2FCC                                                      | $1 \times 10^{-3}$                        | 1292                                    | 1406                 | 6               | 4    |      |   |
|                                                           |                                                           | AC + 1000°C/6h/WQ + CR (80%)                              | 2FCC                                                      | $1 \times 10^{-3}$                        | 1284                                    | 1344                 | 7.6             | 5    |      |   |
|                                                           |                                                           | AC + 1000°C/6h/WQ + CR (84%)                              | FCC + L1 <sub>2</sub>                                     | $1 \times 10^{-3}$                        | 1284                                    | 1344                 | 7.6             | 6    |      |   |
|                                                           |                                                           | AC + 1000°C/6h/WQ + CR (80%) + 900°C/10min                | 2FCC                                                      | $1 \times 10^{-3}$                        | 1021                                    | 1030 <sup>b</sup>    | 15.3            | 5    |      |   |
|                                                           |                                                           | AC + 1000°C/6h/WQ + CR (80%) + 900°C/30min                | 2FCC                                                      | $1 \times 10^{-3}$                        | 970 <sup>b</sup>                        | 980 <sup>b</sup>     | 18 <sup>b</sup> | 5    |      |   |
|                                                           |                                                           | AC + 1000°C/6h/WQ + CR (80%) + 900°C/60min                | 2FCC                                                      | $1 \times 10^{-3}$                        | 810 <sup>b</sup>                        | 870 <sup>b</sup>     | 23 <sup>b</sup> | 5    |      |   |
|                                                           |                                                           | AC + 1000°C/6h/WQ + CR (80%) + 900°C/300min               | 2FCC                                                      | $1 \times 10^{-3}$                        | 610                                     | 780 <sup>b</sup>     | 28 <sup>b</sup> | 5    |      |   |
|                                                           |                                                           | AC + 1000°C/6h/WQ + CR (80%) + 900°C/5h                   | 2FCC, GS = 1 $\mu$ m                                      | $1 \times 10^{-3}$                        | 656                                     | 796                  | 29              | 4    |      |   |
|                                                           |                                                           | AC (with EMS)                                             | FCC                                                       | $2.5 \times 10^{-4}$                      | 570 <sup>b</sup>                        | 693.66               | 25              | 7    |      |   |
|                                                           |                                                           | AC (without EMS)                                          | FCC                                                       | $2.5 \times 10^{-4}$                      | 520 <sup>b</sup>                        | 616.76               | 30              | 7    |      |   |
|                                                           |                                                           | Al <sub>0.2</sub> CoCrCu <sub>0.2</sub> FeNi <sub>2</sub> | Al <sub>0.2</sub> CoCrCu <sub>0.2</sub> FeNi <sub>2</sub> | AC + 1200°C/24h + CR (93%) + 700°C/20h/WQ | FCC+L1 <sub>2</sub> , GS = 4.49 $\mu$ m | $1.7 \times 10^{-3}$ | 719             | 1048 | 30.4 | 8 |
|                                                           |                                                           |                                                           |                                                           | AC + 1200°C/24h + CR (93%) + 800°C/1h/WQ  | FCC, GS = 4.51 $\mu$ m                  | $1.7 \times 10^{-3}$ | 460             | 732  | 31.7 | 8 |
| Al <sub>0.5</sub> CoCrCu <sub>0.5</sub> FeNi <sub>2</sub> | Al <sub>0.5</sub> CoCrCu <sub>0.5</sub> FeNi <sub>2</sub> | AC                                                        | FCC + L1 <sub>2</sub>                                     | $3.3 \times 10^{-3}$                      | 357                                     | 459                  | 9               | 9    |      |   |
|                                                           |                                                           | AC + 700°C/5h/SC                                          | FCC+L1 <sub>2</sub> +Cr-rich IM at GB                     | $3.3 \times 10^{-3}$                      | 365                                     | 365                  | 0.1             | 9    |      |   |
|                                                           |                                                           | AC + 1150°C/5h/WQ                                         | FCC + L1 <sub>2</sub>                                     | $3.3 \times 10^{-3}$                      | 215                                     | 489                  | 39              | 9    |      |   |
| AlCoCrFeNi                                                | Al <sub>0.1</sub> CoCrFeNi                                | As-received                                               | FCC, GS = few mm                                          | $1 \times 10^{-3}$                        | 160 $\pm$ 7                             | 389 $\pm$ 42         | 44 $\pm$ 14.5   | 10   |      |   |
|                                                           |                                                           | FSP                                                       | FCC, GS = 0.35-13.5 $\mu$ m                               | $1 \times 10^{-3}$                        | 544 $\pm$ 50                            | 730 $\pm$ 19         | 27.5 $\pm$ 1.4  | 10   |      |   |
|                                                           |                                                           | As-received                                               | FCC, GS = few mm                                          | $1 \times 10^{-3}$                        | 150 $\pm$ 1                             | 320 <sup>b</sup>     | 50 <sup>b</sup> | 11   |      |   |
|                                                           |                                                           | FSP                                                       | FCC, GS = 14 $\pm$ 10 $\mu$ m                             | $1 \times 10^{-3}$                        | 315 $\pm$ 4                             | 640 <sup>b</sup>     | 75              | 11   |      |   |
| Al <sub>0.25</sub> CoCrFeNi                               | Al <sub>0.25</sub> CoCrFeNi                               | AC                                                        | FCC                                                       | $5 \times 10^{-4}$                        | 118 $\pm$ 4.0                           | 807 $\pm$ 75.5       | 55.2 $\pm$ 0.9  | 12   |      |   |
|                                                           |                                                           | AC + CR (88.5%) + 1000°C/10h/SC                           | FCC                                                       | $5 \times 10^{-4}$                        | 48 $\pm$ 8.5                            | 271 $\pm$ 25.6       | 20.7 $\pm$ 1.4  | 12   |      |   |
|                                                           |                                                           | AC + CR (80%) + 1000°C/10h/SC                             | FCC                                                       | $5 \times 10^{-4}$                        | 72 $\pm$ 7.4                            | 556 $\pm$ 46.0       | 34.9 $\pm$ 1.0  | 12   |      |   |
|                                                           |                                                           | AC + CR (73%) + 1000°C/10h/SC                             | FCC                                                       | $5 \times 10^{-4}$                        | 119 $\pm$ 0.7                           | 697 $\pm$ 8.7        | 47.9 $\pm$ 1.7  | 12   |      |   |

|  |                                          |                                          |                                |                      |                  |                   |                   |       |
|--|------------------------------------------|------------------------------------------|--------------------------------|----------------------|------------------|-------------------|-------------------|-------|
|  |                                          | AC + CR (60%) + 1000°C/10h/SC            | FCC                            | $5 \times 10^{-4}$   | 126±4.5          | 734±30.0          | 50.4±0.9          | 12    |
|  |                                          | AC + CR (50%) + 1000°C/10h/SC            | FCC                            | $5 \times 10^{-4}$   | 150±5.0          | 758±34.0          | 51.1±1.3          | 12    |
|  |                                          | AC + CR (25%) + 1000°C/10h/SC            | FCC                            | $5 \times 10^{-4}$   | 139±22.7         | 805±30.9          | 46.8±1.74         | 12    |
|  | Al <sub>0.3</sub> CoCrFeNi               | AC                                       | FCC+L1 <sub>2</sub>            | $4 \times 10^{-4}$   | 170 <sup>b</sup> | 340 <sup>b</sup>  | 60 <sup>b</sup>   | 13    |
|  |                                          | AC                                       | FCC                            | $4 \times 10^{-4}$   | 275              | 528               | 37                | 14    |
|  |                                          | AC (DS)                                  | FCC, Single-crystal near [001] | $4 \times 10^{-4}$   | 185              | 399               | 80                | 14    |
|  |                                          | Direct laser fabrication                 | FCC                            | $1 \times 10^{-3}$   | 194              | 270 <sup>b</sup>  | 40 <sup>b</sup>   | 15    |
|  |                                          | AC + 700°C/72h/WQ                        | FCC+L1 <sub>2</sub>            | $4 \times 10^{-4}$   | 310 <sup>b</sup> | 525 <sup>b</sup>  | 44 <sup>b</sup>   | 13    |
|  |                                          | AC + 900°C/72h/WQ                        | FCC+B2                         | $4 \times 10^{-4}$   | 240 <sup>b</sup> | 570 <sup>b</sup>  | 45 <sup>b</sup>   | 13    |
|  |                                          | AC + CR (90%) + 1150°C/2min              | FCC+L1 <sub>2</sub> +B2        | $1 \times 10^{-3}$   | 263±32           | 589±51            | 60±7              | 16    |
|  |                                          | AC + CR (90%) + 1150°C/2min + 620°C/50h  | FCC+L1 <sub>2</sub> +B2        | $1 \times 10^{-3}$   | 490±22           | 840±24            | 45±8              | 16    |
|  |                                          | AC + CR (90%) + 1150°C/5min              | FCC+L1 <sub>2</sub> +B2        | $1 \times 10^{-3}$   | 220±20           | 550±35            | 60±4              | 16    |
|  |                                          | AC + CR (90%) + 1150°C/60min             | FCC+L1 <sub>2</sub> +B2        | $1 \times 10^{-3}$   | 159±22           | 410±42            | 65±3              | 16    |
|  |                                          | AC + CR (90%) + 1150°C/60min, 700°C/50h  | FCC+L1 <sub>2</sub> +B2        | $1 \times 10^{-3}$   | 215±16           | 520±21            | 43±6              | 16    |
|  |                                          | AC + CR (90%) + 1150°C/60min, 550°C/150h | FCC+L1 <sub>2</sub> +B2        | $1 \times 10^{-3}$   | 285±14           | 540±43            | 55±12             | 16    |
|  |                                          | AC + 1250°C/50h/SC + 1250°C UF (50%)     | FCC                            | $2 \times 10^{-4}$   | 210              | 500               | 97                | 17    |
|  |                                          | AC + 1050°C HF + 1000°C RS + 900°C HD    | FCC+B2, $\Phi$ 1mm fiber       | $2 \times 10^{-4}$   | 1136             | 1207              | 7.8               | 18    |
|  | Al <sub>0.5</sub> CoCrFeNi               | AC                                       | FCC+BCC                        | $1 \times 10^{-3}$   | 355              | 714               | 41.6              | 19    |
|  |                                          | AC + 650°C/8 h/WQ                        | FCC+BCC+B2                     | $1 \times 10^{-3}$   | 834              | 1220              | 25                | 19    |
|  |                                          | AC + 1250°C/50h/SC + 1250°C UF (50%)     | FCC+BCC/B2                     | $2 \times 10^{-4}$   | 550              | 725               | 56                | 17    |
|  | Al <sub>0.7</sub> CoCrFeNi               | AC + 1250°C/50h/SC + 1250°C UF (50%)     | FCC+BCC/B2                     | $2 \times 10^{-4}$   | 600              | 740               | 8                 | 17    |
|  | AlCoCrFeNi <sub>2.0</sub>                | AC                                       | FCC+B2                         | $1 \times 10^{-3}$   | 545              | 1070 <sup>b</sup> | 17 <sup>b</sup>   | 20    |
|  | AlCoCrFeNi <sub>2.1</sub>                | AC                                       | FCC+B2                         | $1 \times 10^{-3}$   | 545              | 1040 <sup>b</sup> | 18 <sup>b</sup>   | 20    |
|  |                                          | AC                                       | FCC+B2                         | $1 \times 10^{-3}$   | 75               | 944               | 25.6              | 21    |
|  |                                          | AC                                       | L1 <sub>2</sub> +B2            | $8.3 \times 10^{-4}$ | 620              | 1050              | 17                | 22,23 |
|  |                                          | AC + CR (8%)                             | FCC+B2                         | $2 \times 10^{-3}$   | 275              | 1145              | 10.4              | 21    |
|  |                                          | AC + CR (90%)                            | FCC+B2                         | $8.3 \times 10^{-4}$ | 1625             | 1800              | 6                 | 22,23 |
|  |                                          | AC + CR (90%) + 800°C/1h                 | FCC+B2                         | $8.3 \times 10^{-4}$ | 1108             | 1200              | 12                | 22,23 |
|  |                                          | AC + CR (90%) + 1000°C/1h                | FCC+B2                         | $8.3 \times 10^{-4}$ | 844              | 1175              | 23                | 23    |
|  |                                          | AC + CR (90%) + 1200°C/1h                | FCC+B2                         | $8.3 \times 10^{-4}$ | 648              | 1075              | 27                | 23    |
|  | AlCoCrFeNi <sub>2.2</sub>                | AC                                       | FCC+B2                         | $1 \times 10^{-3}$   | 545              | 1120 <sup>b</sup> | 20.5 <sup>b</sup> | 20    |
|  | Al <sub>0.7</sub> CoCrFe <sub>2</sub> Ni | AC                                       | FCC+BCC+B2                     | $2 \times 10^{-4}$   | 866              | 1223              | 7.9               | 24    |

|              |                                                                                              |                                                             |                                                                                  |                    |                  |                   |                 |    |
|--------------|----------------------------------------------------------------------------------------------|-------------------------------------------------------------|----------------------------------------------------------------------------------|--------------------|------------------|-------------------|-----------------|----|
| AlCoCrNiTi   | Al <sub>0.096</sub> CoCrNiTi <sub>0.096</sub>                                                | AC + 1200°C/2h/WQ + CR (66%) + 1160°C/3min/WQ + 800°C/2h/WQ | FCC+L1 <sub>2</sub> , GS = 67μm                                                  | 1×10 <sup>-3</sup> | 750              | 1260 <sup>b</sup> | 45              | 25 |
| AlCoCrFeNiTi | Al <sub>0.17</sub> CoCrFeNiTi <sub>0.09</sub>                                                | AC + 1200°C/4h                                              | FCC                                                                              | 1×10 <sup>-3</sup> | 185 <sup>b</sup> | 503               | 67 <sup>b</sup> | 26 |
|              |                                                                                              | AC + 1200°C/4h + CR (30%) + 1000°C/2h + 800°C/18h/WQ        | FCC+L1 <sub>2</sub> +Ni <sub>2</sub> AlTi                                        | 1×10 <sup>-3</sup> | 645              | 1094              | 39              | 26 |
|              |                                                                                              | AC + 1200°C/4h + CR (70%) + 650°C/4h/WQ                     | FCC+L1 <sub>2</sub> +Ni <sub>2</sub> AlTi                                        | 1×10 <sup>-3</sup> | 1005             | 1273              | 17              | 26 |
| AlCoFeNiSi   | Al <sub>0.2</sub> CoFeNiSi <sub>0.2</sub>                                                    | AC                                                          | FCC                                                                              | 5×10 <sup>-4</sup> | 280              | 632               | 41.6            | 27 |
|              |                                                                                              | AC + CR (60%)                                               | FCC                                                                              | 5×10 <sup>-4</sup> | 1149             | 1149              | 4               | 27 |
| AlCoCrFeMnNi | Al <sub>0.4</sub> CoCrFeMnNi                                                                 | AC                                                          | FCC                                                                              | 1×10 <sup>-3</sup> | 242              | 529               | 47.2            | 28 |
|              | Al <sub>0.6</sub> CoCrFeMnNi                                                                 | AC                                                          | FCC+BCC+B2                                                                       | 1×10 <sup>-3</sup> | 832              | 1174              | 7.7             | 28 |
| AlCrCuFeNi   | Al <sub>0.5</sub> CrCuFeNi <sub>2</sub>                                                      | AC + CR (43%)                                               | 2FCC                                                                             | 1×10 <sup>-3</sup> | 363±60           | 500±20            | 16±7            | 29 |
|              |                                                                                              | AC + CR (43%) + 700°C/24 h                                  | BCC+FCC+ L1 <sub>2</sub>                                                         | 1×10 <sup>-3</sup> | 630±270          | 922±240           | 4.2±1.3         | 29 |
|              |                                                                                              | AC + CR (43%) + 900°C/24 h                                  | BCC+FCC+ L1 <sub>2</sub>                                                         | 1×10 <sup>-3</sup> | 704±180          | 1088±20           | 5.6±3.2         | 29 |
|              |                                                                                              | AC + CR (43%) + 1100°C/24 h                                 | FCC+ L1 <sub>2</sub>                                                             | 1×10 <sup>-3</sup> | 360±100          | 639±5             | 3.4±0.4         | 29 |
|              | Al <sub>0.5</sub> CrCuFeNi <sub>2</sub>                                                      | AC                                                          | FCC                                                                              | 4×10 <sup>-4</sup> | 390              | 470               | -               | 30 |
|              |                                                                                              | AC + CR (50%)                                               | FCC                                                                              | 4×10 <sup>-4</sup> | 1055             | 1179              | 2               | 30 |
| AlCrFeNi     | AlCrFe <sub>2</sub> Ni <sub>2</sub>                                                          | AC                                                          | FCC+BCC+B2                                                                       | 1×10 <sup>-3</sup> | 796              | 1437              | 15.7            | 31 |
| AlCrFeMnNi   | Al <sub>0.6</sub> CrFe <sub>2</sub> Mn <sub>1.2</sub> Ni <sub>0.8</sub>                      | AC                                                          | BCC+B2                                                                           | 1×10 <sup>-3</sup> | 750              | 880               | 2.5             | 32 |
|              | Al <sub>0.7</sub> Cr <sub>0.5</sub> Fe <sub>3.6</sub> Mn <sub>3.1</sub> Ni                   | AC                                                          | FCC, GS = 123μm                                                                  | 5×10 <sup>-4</sup> | 170 <sup>b</sup> | 375 <sup>b</sup>  | 40 <sup>b</sup> | 33 |
|              |                                                                                              | AC + CR (70%) + 800°C/8h                                    | FCC+B2, GS = 5μm                                                                 | 5×10 <sup>-4</sup> | 416              | 530 <sup>b</sup>  | 30 <sup>b</sup> | 33 |
|              |                                                                                              | AC + CR (70%) + 800°C/30h                                   | FCC+B2, GS = 7μm                                                                 | 5×10 <sup>-4</sup> | 361              | 680 <sup>b</sup>  | 30 <sup>b</sup> | 33 |
|              |                                                                                              | AC + CR (70%) + 900°C/8h                                    | FCC+B2, GS = 19μm                                                                | 5×10 <sup>-4</sup> | 219              | 700 <sup>b</sup>  | 43 <sup>b</sup> | 33 |
|              | Al <sub>0.7</sub> Cr <sub>0.5</sub> Fe <sub>3.6</sub> NiMn <sub>3.1</sub> Co <sub>0.09</sub> | AC                                                          | FCC, GS = 118μm                                                                  | 5×10 <sup>-4</sup> | 380 <sup>b</sup> | 870 <sup>b</sup>  | 48 <sup>b</sup> | 33 |
|              |                                                                                              | AC + CR (70%) + 1000°C/1h                                   | FCC+B2+M <sub>23</sub> C <sub>6</sub> +M <sub>7</sub> C <sub>3</sub> , GS = 8μm  | 5×10 <sup>-4</sup> | 557              | 1050 <sup>b</sup> | 26 <sup>b</sup> | 33 |
|              |                                                                                              | AC + CR (70%) + 1000°C/8h                                   | FCC+B2+M <sub>23</sub> C <sub>6</sub> +M <sub>7</sub> C <sub>3</sub> , GS = 23μm | 5×10 <sup>-4</sup> | 488              | 950 <sup>b</sup>  | 28 <sup>b</sup> | 33 |
|              |                                                                                              | AC + CR (70%) + 1100°C/4h                                   | FCC+B2+ M <sub>7</sub> C <sub>3</sub> , GS = 5μm                                 | 5×10 <sup>-4</sup> | 405              | 910 <sup>b</sup>  | 38 <sup>b</sup> | 33 |
| AlFeMnNi     | Al <sub>0.7</sub> Fe <sub>2</sub> Mn <sub>1.8</sub> Ni                                       | AC                                                          | FCC+B2                                                                           | 5×10 <sup>-4</sup> | 270 <sup>b</sup> | 580 <sup>b</sup>  | 23 <sup>b</sup> | 34 |
|              |                                                                                              | AC + 727°C/1h                                               | FCC+B2                                                                           | 5×10 <sup>-4</sup> | 420 <sup>b</sup> | 780 <sup>b</sup>  | 22 <sup>b</sup> | 34 |
|              |                                                                                              | AC + 727°C/72h                                              | FCC+B2                                                                           | 5×10 <sup>-4</sup> | 483              | 880 <sup>b</sup>  | 15 <sup>b</sup> | 34 |
|              | Al <sub>0.7</sub> Fe <sub>2</sub> Mn <sub>1.8</sub> NiCo <sub>0.07</sub>                     | AC                                                          | FCC+MS                                                                           | 5×10 <sup>-4</sup> | 260 <sup>b</sup> | 680 <sup>b</sup>  | 39.3            | 34 |
|              |                                                                                              | AC + 727°C/1h                                               | FCC + MS + B2                                                                    | 5×10 <sup>-4</sup> | 540 <sup>b</sup> | 875 <sup>b</sup>  | 15 <sup>b</sup> | 34 |
|              |                                                                                              | AC + 727°C/72h                                              | FCC + MS + B2                                                                    | 5×10 <sup>-4</sup> | 611              | 940 <sup>b</sup>  | 10 <sup>b</sup> | 34 |

|            |                                                           |                                                                |                           |                      |                  |                  |                 |    |
|------------|-----------------------------------------------------------|----------------------------------------------------------------|---------------------------|----------------------|------------------|------------------|-----------------|----|
|            |                                                           | AC + CR (70%) + 1000°C/1h                                      | FCC + MS + B2, GS = 1.9µm | $5 \times 10^{-4}$   | 532              | 930 <sup>b</sup> | 23.8            | 34 |
|            |                                                           | AC + CR (70%) + 1100°C/4h + CR (50%) + 1000°C/4h               | FCC + MS + B2, GS = 4.5µm | $5 \times 10^{-4}$   | 426              | 945 <sup>b</sup> | 32.8            | 34 |
| CoCrFeNi   | CoCrFeNi                                                  | AC                                                             | FCC                       | $8.3 \times 10^{-5}$ | 188              | 457              | 50              | 35 |
|            |                                                           | AC                                                             | FCC                       | $1 \times 10^{-3}$   | 140              | 488              | 83              | 36 |
|            |                                                           | AC                                                             | FCC                       | $1 \times 10^{-3}$   | 147              | 413              | 48              | 37 |
|            |                                                           | AC + 1000°C/24h                                                | FCC                       | $1 \times 10^{-3}$   | 130              | 458              | 87              | 36 |
|            |                                                           | AC + 1200°C/4h                                                 | FCC                       | $1 \times 10^{-3}$   | 165 <sup>b</sup> | 453              | 67 <sup>b</sup> | 26 |
|            |                                                           | AC + 500°C/4h                                                  | FCC                       | $1 \times 10^{-3}$   | 155              | 472.4            | 58.9            | 38 |
|            |                                                           | AC + 1000°C/24h/SC + CR (80%) + 1100°C/1h/SC                   | FCC, GS = 60-80µm         | $7.3 \times 10^{-4}$ | 197              | 582              | 82.4            | 39 |
|            |                                                           | AC + 1000°C/24h/SC + CR (80%) + 625°C/1h/SC                    | FCC, GS = 1-2µm           | $7.3 \times 10^{-4}$ | 540              | 786              | 49.3            | 39 |
|            |                                                           | AC + 1000°C/24 h + 1000°C HR (92%) + 900°C/1h                  | FCC, GS = 11 µm           | $1 \times 10^{-3}$   | 300              | 671              | 42              | 40 |
|            |                                                           | AC + 1200°C/24 h + CR (92%) + 900°C/1h                         | FCC, GS = 24µm            | $1 \times 10^{-3}$   | 273              | 714              | 38              | 41 |
|            |                                                           | SLM/50µm per layer                                             | FCC                       | $8.3 \times 10^{-5}$ | 402              | 480              | 8               | 35 |
|            |                                                           | SLM/20µm per layer                                             | FCC                       | $8.3 \times 10^{-5}$ | 600              | 745              | 32              | 35 |
|            |                                                           | SLM/20µm per layer + 750°C/12h/WQ                              | FCC                       | $8.3 \times 10^{-5}$ | 495              | 695              | 30              | 35 |
|            |                                                           | SLM/20µm per layer + 1000°C/12h/WQ                             | FCC                       | $8.3 \times 10^{-5}$ | 433              | 682              | 42              | 35 |
| CoCrFeMn   | Co <sub>0.25</sub> Cr <sub>0.25</sub> FeMn                | AC + 900°C HR (50%) + 1200°C/2h/WQ                             | FCC                       | $1 \times 10^{-3}$   | 240              | 489              | 58              | 42 |
|            | Co <sub>0.2</sub> Cr <sub>0.2</sub> FeMn <sub>0.6</sub>   | AC + 900°C HR (50%) + 1200°C/2h/WQ                             | FCC+HCP, GS = 45µm        | $1 \times 10^{-3}$   | 250              | 730              | 50              | 43 |
|            |                                                           | AC + 900°C HR (50%) + 1200°C/2h/WQ + CR (60%) + 900°C/3min/WQ  | FCC+HCP, GS = 4.5µm       | $1 \times 10^{-3}$   | 340 <sup>b</sup> | 870              | 75              | 43 |
|            |                                                           | AC + 900°C HR (50%) + 1200°C/2h/WQ + CR (60%) + 900°C/30min/WQ | FCC+HCP, GS = 15µm        | $1 \times 10^{-3}$   | 305              | 830              | 63              | 43 |
|            | Co <sub>0.24</sub> Cr <sub>0.24</sub> FeMn <sub>1.2</sub> | AC + 900°C HR (50%) + 1200°C/2h/WQ                             | FCC, GS = 90µm            | $1 \times 10^{-3}$   | 100 <sup>b</sup> | 360 <sup>b</sup> | 47 <sup>b</sup> | 44 |
|            | Co <sub>0.2</sub> Cr <sub>0.2</sub> FeMn <sub>0.6</sub>   | AC + 900°C HR (50%) + 1200°C/2h/WQ + CR (60%) + 900°C/3min/WQ  | FCC+HCP, GS = 4.5µm       | $1 \times 10^{-3}$   | 340 <sup>b</sup> | 870              | 75              | 44 |
| CoCrMnNi   | CoCrMnNi                                                  | AC + 1100°C/24 h + CR (90%) + 1000°C/1h                        | FCC, GS = 36µm            | $1 \times 10^{-3}$   | 280              | 699              | 43              | 41 |
| CoFeMnNi   | CoFeMnNi                                                  | AC + 1100°C/24 h + CR (90%) + 1000°C/1h                        | FCC, GS = 48µm            | $1 \times 10^{-3}$   | 175              | 551              | 41              | 41 |
| CrFeMnNi   | Cr <sub>0.66</sub> FeMnNi                                 | AC + 1200°C/24h/WQ + CR (86%) + 900°C/1h                       | FCC                       | $1 \times 10^{-3}$   | 265 <sup>b</sup> | 630 <sup>b</sup> | 37 <sup>b</sup> | 45 |
| CoCrFeMnNi | CoCrFeMnNi                                                | AC                                                             | FCC                       | $1 \times 10^{-3}$   | 209              | 496              | 61.7            | 28 |
|            |                                                           | AC                                                             | FCC                       | $1 \times 10^{-3}$   | 215              | 491              | 71              | 36 |
|            |                                                           | AC + 1000°C/24h                                                | FCC                       | $1 \times 10^{-3}$   | 162              | 443              | 68              | 36 |

|             |                                                                                |                                                               |                                                                                             |                      |                  |          |                 |    |
|-------------|--------------------------------------------------------------------------------|---------------------------------------------------------------|---------------------------------------------------------------------------------------------|----------------------|------------------|----------|-----------------|----|
|             |                                                                                | AC + 1000°C/24h/SC + CR (80%) + 1100°C/1h                     | FCC, GS = 60-80μm                                                                           | $7.3 \times 10^{-4}$ | 135              | 497      | 55.4            | 39 |
|             |                                                                                | AC + 1000°C/24h/SC + CR (80%) + 650°C/1h                      | FCC, GS = 1-2μm                                                                             | $7.3 \times 10^{-4}$ | 660              | 851      | 24.9            | 39 |
|             |                                                                                | AC + CF & CR (60%) + 800°C/1h                                 | FCC, GS = 6 μm                                                                              | $1 \times 10^{-3}$   | 410±21           | 763±32   | 57±7            | 46 |
|             |                                                                                | AC + 1000°C/24h                                               | FCC                                                                                         | $1 \times 10^{-3}$   | 160 <sup>b</sup> | 440      | 71              | 47 |
|             |                                                                                | AC + 1000°C/24h + compressed 40% + 1000°C/1h + 77K CrR (80%)  | FCC                                                                                         | $1 \times 10^{-3}$   | 1500             | 1500     | 12              | 47 |
|             |                                                                                | AC + 1000°C/24h + compressed 40% + 1000°C/1h + 293K CrR (80%) | FCC                                                                                         | $1 \times 10^{-3}$   | 1200             | 1200     | 14              | 47 |
|             |                                                                                | AC + 1200°C/48h + CR (87%) + 800°C/1h                         | FCC, GS = 4.4 μm                                                                            | $1 \times 10^{-3}$   | 362              | 651      | 51              | 48 |
|             |                                                                                | AC + 1200°C/48h + CR (87%) + 1000°C/1h                        | FCC, GS = 50 μm                                                                             | $1 \times 10^{-3}$   | 197              | 568      | 60              | 48 |
|             |                                                                                | AC + 1200°C/48h + CR (87%) + 1150°C/1h                        | FCC, GS = 155 μm                                                                            | $1 \times 10^{-3}$   | 171              | 530      | 57              | 48 |
|             |                                                                                | AC + 1000°C/24h + 1000°C HR (92%) + 900°C/1h                  | FCC, GS = 32 μm                                                                             | $1 \times 10^{-3}$   | 223              | 587      | 39              | 40 |
|             |                                                                                | AC + 1200°C/48h + RS (60%) + 900°C/1h                         | FCC, GS = 17μm                                                                              | $1 \times 10^{-3}$   | 265 ± 10         | 600 ± 40 | 48 <sup>b</sup> | 49 |
|             | Co <sub>0.19</sub> Cr <sub>0.08</sub> Fe <sub>1.54</sub> Mn <sub>1.04</sub> Ni | AC + 900°C HR (50%) + 1200°C/2h/WQ                            | FCC, GS = 24μm                                                                              | $2.5 \times 10^{-3}$ | 95               | 375      | 58              | 50 |
|             |                                                                                | AC + 900°C HR (50%) + 1200°C/2h/WQ + CR (64%)                 | FCC                                                                                         | $2.5 \times 10^{-3}$ | 760              | 760      | 17              | 50 |
|             |                                                                                | AC + 900°C HR (50%) + 1200°C/2h/WQ + CR (64%) + 900°C/10min   | FCC, GS = 12μm                                                                              | $2.5 \times 10^{-3}$ | 240              | 645      | 59 <sup>b</sup> | 50 |
|             | Co <sub>1.4</sub> CrFeMnNi                                                     | AC + 1000°C/24h/SC + CR (80%) + 1100°C/1h                     | FCC, GS = 60-80μm                                                                           | $7.3 \times 10^{-4}$ | 134              | 414      | 73.5            | 39 |
|             |                                                                                | AC + 1000°C/24h/SC + CR (80%) + 625°C/1h                      | FCC, GS = 1-2μm                                                                             | $7.3 \times 10^{-4}$ | 586              | 715      | 32.8            | 39 |
|             | CoCr <sub>1.3</sub> FeMnNi <sub>0.7</sub>                                      | AC + 1000°C/24h/SC + CR (80%) + 1100°C/1h                     | FCC, GS = 60-80μm                                                                           | $7.3 \times 10^{-4}$ | 162              | 462      | 51.6            | 39 |
|             |                                                                                | AC + 1000°C/24h/SC + CR (80%) + 675°C/1h                      | FCC+σ, GS = 1-2μm                                                                           | $7.3 \times 10^{-4}$ | 1153             | 1187     | 1.8             | 39 |
| CoCrFeMnNiV | CoCrFeMnNiV                                                                    | AC                                                            | FCC+σ                                                                                       | $1 \times 10^{-3}$   |                  | 90       | 0               | 36 |
|             |                                                                                | AC + 1000°C/24h                                               | FCC+σ                                                                                       | $1 \times 10^{-3}$   |                  | 62       | 0               | 36 |
| CoCrFeNiTi  | Co <sub>1.5</sub> CrFeNi <sub>1.5</sub> Ti <sub>0.5</sub>                      | MA + SPS                                                      | 2FCC+BCC                                                                                    | $2.5 \times 10^{-5}$ | 1308             | 1384     | 4.01            | 51 |
|             | Co <sub>1.5</sub> CrFeNi <sub>1.5</sub> Ti <sub>0.5</sub> Mo <sub>0.1</sub>    | AC                                                            | FCC+Ni <sub>3</sub> Ti+ (Cr <sub>11</sub> Fe <sub>13</sub> Ni <sub>4</sub> )Mo <sub>3</sub> | $5 \times 10^{-5}$   | 610              | 770      | 3.3             | 52 |
|             |                                                                                | SEBM                                                          | FCC+SC+Ni <sub>3</sub> Ti                                                                   | $5 \times 10^{-5}$   | 750              | 930      | 4 <sup>b</sup>  | 52 |
|             |                                                                                | SEBM + 1120°C/3h                                              | FCC+SC                                                                                      | $5 \times 10^{-5}$   | 900 <sup>b</sup> | 1320     | 18 <sup>b</sup> | 52 |
|             |                                                                                | SEBM + 1120°C/3h/WQ                                           | FCC+SC                                                                                      | $5 \times 10^{-5}$   | 770              | 1120     | 36 <sup>b</sup> | 52 |
| CoCrFeNbNi  | CoCrFeNb <sub>0.103</sub> Ni                                                   | AC                                                            | FCC+LAVES                                                                                   | $1 \times 10^{-3}$   | 317              | 622      | 19.2            | 37 |
|             | CoCrFeNb <sub>0.155</sub> Ni                                                   | AC                                                            | FCC+LAVES                                                                                   | $1 \times 10^{-3}$   | 321              | 744      | 23.3            | 37 |
|             | CoCrFeNb <sub>0.206</sub> Ni                                                   | AC                                                            | FCC+LAVES                                                                                   | $1 \times 10^{-3}$   | 402              | 807      | 8.6             | 37 |



|            |                                                                 |                                                            |                                                                      |                    |                      |                            |                            |    |
|------------|-----------------------------------------------------------------|------------------------------------------------------------|----------------------------------------------------------------------|--------------------|----------------------|----------------------------|----------------------------|----|
|            | CoCrFeNb <sub>0.309</sub> Ni                                    | AC                                                         | FCC+LAVES                                                            | $1 \times 10^{-3}$ | 478                  | 879                        | 3.5                        | 37 |
|            | CoCrFeNb <sub>0.412</sub> Ni                                    | AC                                                         | FCC+LAVES                                                            | $1 \times 10^{-3}$ | 637                  | 1004                       | 1.3                        | 37 |
| CoCrFeMoNi | CoCrFeMo <sub>0.1</sub> Ni                                      | AC + 500°C/4h                                              | FCC                                                                  | $1 \times 10^{-3}$ | 198.8                | 479.0                      | 51.1                       | 38 |
|            | CoCrFeMo <sub>0.2</sub> Ni                                      | AC + 500°C/4h                                              | FCC                                                                  | $1 \times 10^{-3}$ | 254.7                | 589.6                      | 55.1                       | 38 |
|            | CoCrFeMo <sub>0.3</sub> Ni                                      | AC + 500°C/4h                                              | FCC+ $\sigma$                                                        | $1 \times 10^{-3}$ | 305.3                | 709.7                      | 49.3                       | 38 |
|            |                                                                 | AC + CR (60%) + 850°C/1h                                   | FCC+ $\sigma$ + $\mu$                                                | $1 \times 10^{-3}$ | 815.5                | 1186.5                     | 18.9                       | 38 |
|            |                                                                 | AC + CR (60%) + 950°C/5 h                                  | FCC+ $\sigma$ + $\mu$                                                | $1 \times 10^{-3}$ | 646.7                | 1042.0                     | 32.5                       | 38 |
|            |                                                                 | AC + CR (60%) + 950°C/5h + 700°C/5h                        | FCC+ $\sigma$ + $\mu$                                                | $1 \times 10^{-3}$ | 683.7                | 1066.6                     | 30.4                       | 38 |
|            | Co <sub>1.75</sub> Cr <sub>0.75</sub> FeMo <sub>0.5</sub> Ni    | AC + 1200°C/48h/SC + 1100°C HR & CR (70%)                  | FCC                                                                  | $1 \times 10^{-3}$ | 350                  | 720                        | 21.9                       | 53 |
|            |                                                                 | AC + 1200°C/48h/SC + 1100°C HR & CR (70%) + 800°C/1h/AC    | FCC+ $\mu$                                                           | $1 \times 10^{-3}$ | 1311                 | 1410                       | 12.1                       | 53 |
|            |                                                                 | AC + 1200°C/48h/SC + 1100°C HR & CR (70%) + 850°C/5min/WQ  | FCC+ $\mu$                                                           | $1 \times 10^{-3}$ | 1212                 | 1360                       | 14.9                       | 53 |
|            |                                                                 | AC + 1200°C/48h/SC + 1100°C HR & CR (70%) + 900°C/5min/WQ  | FCC+ $\mu$                                                           | $1 \times 10^{-3}$ | 1028                 | 1249                       | 18.3                       | 53 |
|            |                                                                 | AC + 1200°C/48h/SC + 1100°C HR & CR (70%) + 1000°C/5min/WQ | FCC+ $\mu$                                                           | $1 \times 10^{-3}$ | 879                  | 1194                       | 25.4                       | 53 |
|            |                                                                 | AC + 1200°C/48h/SC + 1100°C HR & CR (70%) + 1000°C/1h/AC   | FCC+ $\mu$                                                           | $1 \times 10^{-3}$ | 799                  | 1127                       | 28.2                       | 53 |
|            |                                                                 | AC + 1200°C/48h/SC + 1100°C HR & CR (70%) + 1150°C/1h/AC   | FCC+ $\mu$                                                           | $1 \times 10^{-3}$ | 350                  | 918                        | 62.4                       | 53 |
|            | Co <sub>2.125</sub> Cr <sub>0.625</sub> FeMo <sub>0.25</sub> Ni | AC + 1200°C/48h/SC + 1100°C HR & CR (70%)                  | FCC                                                                  | $1 \times 10^{-3}$ | 220 <sup>b</sup>     | 540 <sup>b</sup>           | 60 <sup>b</sup>            | 53 |
|            |                                                                 | AC + 1200°C/48h/SC + 1100°C HR & CR (70%) + 700°C/1h/AC    | FCC                                                                  | $1 \times 10^{-3}$ | 800 <sup>b</sup>     | 1050 <sup>b</sup>          | 45 <sup>b</sup>            | 53 |
|            |                                                                 | AC + 1200°C/48h/SC + 1100°C HR & CR (70%) + 800°C/1h/AC    | FCC                                                                  | $1 \times 10^{-3}$ | 570 <sup>b</sup>     | 950 <sup>b</sup>           | 55 <sup>b</sup>            | 53 |
|            |                                                                 | AC + 1200°C/48h/SC + 1100°C HR & CR (70%) + 1000°C/1h/AC   | FCC                                                                  | $1 \times 10^{-3}$ | 370 <sup>b</sup>     | 810 <sup>b</sup>           | 72 <sup>b</sup>            | 53 |
| CoCrFeNiV  | CoCrFeNiV                                                       | AC                                                         | FCC+ $\sigma$                                                        | $1 \times 10^{-3}$ |                      | 311                        | 0                          | 36 |
|            |                                                                 | AC + 1000°C/24h                                            | FCC+ $\sigma$                                                        | $1 \times 10^{-3}$ |                      | 330                        | 0                          | 36 |
| CoCuFeNiSn | CoCuFeNiSn <sub>x</sub> (0<x≤0.2)                               | AC                                                         | FCC (0<x<0.04)<br>FCC+Cu <sub>81</sub> Sn <sub>22</sub> (0.04≤x≤0.2) | $2 \times 10^{-4}$ | 250-350 <sup>b</sup> | 263(x=0.2)-<br>633(x=0.07) | 1.2(x=0.2)-<br>19.8(x=0.0) | 54 |

|              |                                                                            |                                                                       |                                                         |                    |                      |                                               |                                 |    |
|--------------|----------------------------------------------------------------------------|-----------------------------------------------------------------------|---------------------------------------------------------|--------------------|----------------------|-----------------------------------------------|---------------------------------|----|
|              |                                                                            |                                                                       |                                                         |                    |                      | )                                             | 5)                              |    |
| CoCuFeMnNiSn | CoCuFeMnNiSn <sub>x</sub> (0<x≤0.2)                                        | AC (DS)                                                               | FCC (0<x<0.05)<br>FCC+Cu <sub>5.6</sub> Sn (0.05≤x≤0.2) | 1×10 <sup>-4</sup> | 200-250 <sup>b</sup> | 360(x=0.2)-<br>476.9<br>(x=0.03) <sup>b</sup> | 1.7(x=0.2)-<br>16.9(x=0.0<br>3) | 55 |
| HfNbTiZr     | HfNbTiZr                                                                   | AC + 1300°C/6h/SC                                                     | BCC                                                     | 1×10 <sup>-3</sup> | 879                  | 969                                           | 14.9                            | 56 |
| HfTaTiZr     | HfTaTiZr                                                                   | AC                                                                    | BCC                                                     | 1×10 <sup>-3</sup> | 1356±86              | 1452±88                                       | 4±1.7                           | 57 |
|              | HfTa <sub>0.6</sub> TiZr                                                   | AC                                                                    | BCC                                                     | 1×10 <sup>-3</sup> | 750±80               | 1110±85                                       | 22.1±1.6                        | 57 |
|              | HfTa <sub>0.5</sub> TiZr                                                   | AC                                                                    | BCC+HCP                                                 | 1×10 <sup>-3</sup> | 687±23               | 1119±39                                       | 29.9±2.7                        | 57 |
|              | HfTa <sub>0.4</sub> TiZr                                                   | AC                                                                    | BCC+HCP                                                 | 1×10 <sup>-3</sup> | 345±26               | 1126±55                                       | 30.6±1.7                        | 57 |
| HfNbTaTiZr   | HfNbTaTiZr                                                                 | AC                                                                    | BCC                                                     | 5×10 <sup>-3</sup> | 790-805              | 857-888                                       | 5.8-9.4                         | 58 |
|              |                                                                            | AC + HIP@1200°C/207MPa/2h + 1200°C/24h + CR<br>(86.4%)                | BCC                                                     | 1×10 <sup>-3</sup> | 1202                 | 1295                                          | 4.7                             | 59 |
|              |                                                                            | AC + HIP@1200°C/207MPa/2h + 1200°C/24h + CR<br>(86.4%) + 800°C/2h/SC  | BCC                                                     | 1×10 <sup>-3</sup> | 1303                 | 1334                                          | 1.9                             | 59 |
|              |                                                                            | AC + HIP@1200°C/207MPa/2h + 1200°C/24h + CR<br>(86.4%) + 1000°C/2h/SC | BCC                                                     | 1×10 <sup>-3</sup> | 1145                 | 1262                                          | 9.7                             | 59 |
|              | Hf <sub>0.5</sub> Nb <sub>0.5</sub> Ta <sub>0.5</sub> Ti <sub>1.5</sub> Zr | AC                                                                    | BCC                                                     | 1×10 <sup>-3</sup> | 903                  | 990                                           | 18.8                            | 60 |
|              | HfNb <sub>0.2</sub> Ta <sub>0.2</sub> Ti <sub>1.3</sub> Zr                 | AC + CR (60%) + 900°C/30min                                           | BCC+HCP                                                 | 1×10 <sup>-4</sup> | 540                  | 995                                           | 23                              | 61 |

a. The following acronyms are used: AC (as-cast); CR (cold-rolled); HR (hot-rolled); CrR (cryo-rolled); CF (cold forged); HF (hot forged); UF (upset forged); HD (hot drawing); RS (rotary swaged); SC (slow cooled); WQ (water quench); SLM (selective laser melting); HIP (hot isostatic pressing); DS (Directional solidification); MA (mechanically alloyed); SPS (spark plasma sintered); SEBM (selective electron beam melting); FSP (friction stir processing); EMS (electromagnetic stirring); GB (grain boundary); GS (grain size).

b. These data were measured from the tensile curves presented in the literature.

## Supplementary References:

- 1 Kuznetsov, A. V. *et al.* Tensile properties of an AlCrCuNiFeCo high-entropy alloy in as-cast and wrought conditions. *Mater Sci Eng A* **533**, 107-118 (2012).
- 2 Wang, F., Zhang, Y. & Chen, G. Tensile and compressive mechanical behavior of a CoCrCuFeNiAl<sub>0.5</sub> high entropy alloy. *Int J Mod Phys B* **23**, 1254-1259 (2009).
- 3 Sheng, H. F. & Peng, L. M. Microstructure and tensile properties of Al<sub>0.5</sub>CoCrCuFeNi high-entropy alloy. *Appl Mech Mater* **456**, 494-497 (2014).
- 4 Tsai, C.-W., Tsai, M.-H., Yeh, J.-W. & Yang, C.-C. Effect of temperature on mechanical properties of Al<sub>0.5</sub>CoCrCuFeNi wrought alloy. *J Alloy Compd* **490**, 160-165 (2010).
- 5 Tsai, C. W. *et al.* Microstructure and tensile properties of Al<sub>0.5</sub>CoCrCuFeNi alloys produced by simple rolling and annealing. *Materials Science and Technology* **31**, 1178-1183 (2015).
- 6 Hemphill, M. A. *et al.* Fatigue behavior of Al<sub>0.5</sub>CoCrCuFeNi high entropy alloys. *Acta Mater* **60**, 5723-5734 (2012).
- 7 Du, Y. *et al.* Effect of electromagnetic stirring on microstructure and properties of Al<sub>0.5</sub>CoCrCuFeNi alloy. *Procedia Engineering* **27**, 1129-1134 (2012).
- 8 Wang, Z. G. *et al.* Effect of coherent L1<sub>2</sub> nanoprecipitates on the tensile behavior of a fcc-based high-entropy alloy. *Mater Sci Eng A* **696**, 503-510 (2017).
- 9 Daoud, H. M. *et al.* Microstructure and tensile behavior of Al<sub>8</sub>Co<sub>17</sub>Cr<sub>17</sub>Cu<sub>8</sub>Fe<sub>17</sub>Ni<sub>33</sub> (at.%) high-entropy alloy. *JOM* **65**, 1805-1814 (2013).
- 10 Komarasamy, M. *et al.* Effect of Microstructure on the deformation mechanism of friction stir-processed Al<sub>0.1</sub>CoCrFeNi high entropy alloy. *Materials Research Letters* **3**, 30-34 (2014).
- 11 Kumar, N. *et al.* Friction stir processing of a high entropy alloy Al<sub>0.1</sub>CoCrFeNi. *JOM* **67**, 1007-1013 (2015).
- 12 Hou, J., Zhang, M., Yang, H. & Qiao, J. Deformation behavior of Al<sub>0.25</sub>CoCrFeNi high-entropy alloy after recrystallization. *Metals* **7**, 111 (2017).
- 13 Shun, T.-T. & Du, Y.-C. Microstructure and tensile behaviors of FCC Al<sub>0.3</sub>CoCrFeNi high entropy alloy. *J Alloy Compd* **479**, 157-160 (2009).
- 14 Ma, S. G. *et al.* Superior high tensile elongation of a single-crystal CoCrFeNiAl<sub>0.3</sub> high-entropy alloy by Bridgman solidification. *Intermetallics* **54**, 104-109 (2014).
- 15 Joseph, J., Stanford, N., Hodgson, P. & Fabijanic, D. M. Tension/compression asymmetry in additive manufactured face centered cubic high entropy alloy. *Scripta Mater* **129**, 30-34 (2017).
- 16 Gwalani, B. *et al.* Optimizing the coupled effects of Hall-Petch and precipitation strengthening in a Al<sub>0.3</sub>CoCrFeNi high entropy alloy. *Mater Design* **121**, 254-260 (2017).
- 17 Rao, J. C. *et al.* Secondary phases in Al<sub>x</sub>CoCrFeNi high-entropy alloys: An in-situ TEM heating study and thermodynamic appraisal. *Acta Mater* **131**, 206-220 (2017).
- 18 Li, D. *et al.* High-entropy Al<sub>0.3</sub>CoCrFeNi alloy fibers with high tensile strength and ductility at ambient and cryogenic temperatures. *Acta Mater* **123**, 285-294 (2017).
- 19 Niu, S. *et al.* Strengthening of nanoprecipitations in an annealed Al<sub>0.5</sub>CoCrFeNi high entropy alloy. *Mater Sci Eng A* **671**, 82-86 (2016).
- 20 Lu, Y. *et al.* Directly cast bulk eutectic and near-eutectic high entropy alloys with balanced strength and ductility in a wide temperature range. *Acta Mater* **124**, 143-150 (2017).
- 21 Lu, Y. *et al.* A promising new class of high-temperature alloys: eutectic high-entropy alloys. *Scientific reports* **4**, 6200 (2014).
- 22 Wani, I. S. *et al.* Ultrafine-grained AlCoCrFeNi<sub>2.1</sub> eutectic high-entropy alloy. *Materials Research Letters* **4**, 174-179 (2016).
- 23 Wani, I. S. *et al.* Tailoring nanostructures and mechanical properties of AlCoCrFeNi<sub>2.1</sub> eutectic high entropy alloy using thermo-mechanical processing. *Mater Sci Eng A* **675**, 99-109 (2016).
- 24 Wang, Q. *et al.* A cuboidal B2 nanoprecipitation-enhanced body-centered-cubic alloy Al<sub>0.7</sub>CoCrFe<sub>2</sub>Ni with prominent tensile properties. *Scripta Mater* **120**, 85-89 (2016).
- 25 Zhao, Y. L. *et al.* Heterogeneous precipitation behavior and stacking-fault-mediated deformation in a CoCrNi-based medium-entropy alloy. *Acta Mater* **138**, 72-82 (2017).
- 26 He, J. Y. *et al.* A precipitation-hardened high-entropy alloy with outstanding tensile properties. *Acta Mater* **102**, 187-196 (2016).
- 27 Zuo, T.-t., Ren, S.-b., Liaw, P. K. & Zhang, Y. Processing effects on the magnetic and mechanical properties of FeCoNiAl<sub>0.2</sub>Si<sub>0.2</sub> high entropy alloy. *International Journal of Minerals, Metallurgy, and Materials* **20**, 549-555 (2013).
- 28 He, J. Y. *et al.* Effects of Al addition on structural evolution and tensile properties of the FeCoNiCrMn high-entropy alloy system. *Acta Mater* **62**, 105-113 (2014).

- 29 Ng, C. *et al.* Phase stability and tensile properties of Co-free Al<sub>0.5</sub>CrCuFeNi<sub>2</sub> high-entropy alloys. *J Alloy Compd* **584**, 530-537 (2014).
- 30 Ma, S. G., Chen, Z. D. & Zhang, Y. Evolution of microstructures and properties of the Al<sub>x</sub>CrCuFeNi<sub>2</sub> high-entropy alloys. *Mater Sci Forum* **745-746**, 706-714 (2013).
- 31 Dong, Y. *et al.* A multi-component AlCrFe<sub>2</sub>Ni<sub>2</sub> alloy with excellent mechanical properties. *Mater Lett* **169**, 62-64 (2016).
- 32 Shaysultanov, D. G. *et al.* Novel Fe<sub>36</sub>Mn<sub>21</sub>Cr<sub>18</sub>Ni<sub>15</sub>Al<sub>10</sub> high entropy alloy with bcc/B2 dual-phase structure. *J Alloy Compd* **705**, 756-763 (2017).
- 33 Wang, Z., Baker, I., Guo, W. & Poplawsky, J. D. The effect of carbon on the microstructures, mechanical properties, and deformation mechanisms of thermo-mechanically treated Fe<sub>40.4</sub>Ni<sub>11.3</sub>Mn<sub>34.8</sub>Al<sub>7.5</sub>Cr<sub>6</sub> high entropy alloys. *Acta Mater* **126**, 346-360 (2017).
- 34 Wang, Z. & Baker, I. Effects of annealing and thermo-mechanical treatment on the microstructures and mechanical properties of a carbon-doped FeNiMnAl multi-component alloy. *Mater Sci Eng A* **693**, 101-110 (2017).
- 35 Brif, Y., Thomas, M. & Todd, I. The use of high-entropy alloys in additive manufacturing. *Scripta Mater* **99**, 93-96 (2015).
- 36 Salishchev, G. A. *et al.* Effect of Mn and V on structure and mechanical properties of high-entropy alloys based on CoCrFeNi system. *J Alloy Compd* **591**, 11-21 (2014).
- 37 Liu, W. H. *et al.* Effects of Nb additions on the microstructure and mechanical property of CoCrFeNi high-entropy alloys. *Intermetallics* **60**, 1-8 (2015).
- 38 Liu, W. H. *et al.* Ductile CoCrFeNiMo<sub>x</sub> high entropy alloys strengthened by hard intermetallic phases. *Acta Materialia* **116**, 332-342 (2016).
- 39 Zaddach, A. J., Scattergood, R. O. & Koch, C. C. Tensile properties of low-stacking fault energy high-entropy alloys. *Mater Sci Eng A* **636**, 373-378 (2015).
- 40 Gali, A. & George, E. P. Tensile properties of high- and medium-entropy alloys. *Intermetallics* **39**, 74-78 (2013).
- 41 Wu, Z., Bei, H., Pharr, G. M. & George, E. P. Temperature dependence of the mechanical properties of equiatomic solid solution alloys with face-centered cubic crystal structures. *Acta Mater* **81**, 428-441 (2014).
- 42 Deng, Y. *et al.* Design of a twinning-induced plasticity high entropy alloy. *Acta Mater* **94**, 124-133 (2015).
- 43 Li, Z., Tasan, C. C., Pradeep, K. G. & Raabe, D. A TRIP-assisted dual-phase high-entropy alloy: Grain size and phase fraction effects on deformation behavior. *Acta Mater* **131**, 323-335 (2017).
- 44 Li, Z. *et al.* Metastable high-entropy dual-phase alloys overcome the strength-ductility trade-off. *Nature* **534**, 227-230 (2016).
- 45 Wu, Z. & Bei, H. Microstructures and mechanical properties of compositionally complex Co-free FeNiMnCr<sub>18</sub> FCC solid solution alloy. *Mater Sci Eng A* **640**, 217-224 (2015).
- 46 Gludovatz, B. *et al.* A fracture-resistant high-entropy alloy for cryogenic applications. *Science* **345**, 1153-1158 (2014).
- 47 Stepanov, N. *et al.* Effect of cryo-deformation on structure and properties of CoCrFeNiMn high-entropy alloy. *Intermetallics* **59**, 8-17 (2015).
- 48 Otto, F. *et al.* The influences of temperature and microstructure on the tensile properties of a CoCrFeMnNi high-entropy alloy. *Acta Mater* **61**, 5743-5755 (2013).
- 49 Laplanche, G. *et al.* Microstructure evolution and critical stress for twinning in the CrMnFeCoNi high-entropy alloy. *Acta Mater* **118**, 152-163 (2016).
- 50 Yao, M. J., Pradeep, K. G., Tasan, C. C. & Raabe, D. A novel, single phase, non-equiatomic FeMnNiCoCr high-entropy alloy with exceptional phase stability and tensile ductility. *Scripta Mater* **72-73**, 5-8 (2014).
- 51 Moravcik, I. *et al.* Microstructure and mechanical properties of Ni<sub>1.5</sub>Co<sub>1.5</sub>CrFeTi<sub>0.5</sub> high entropy alloy fabricated by mechanical alloying and spark plasma sintering. *Mater Design* **119**, 141-150 (2017).
- 52 Fujieda, T. *et al.* CoCrFeNiTi-based high-entropy alloy with superior tensile strength and corrosion resistance achieved by a combination of additive manufacturing using selective electron beam melting and solution treatment. *Mater Lett* **189**, 148-151 (2017).
- 53 Ming, K., Bi, X. & Wang, J. Precipitation strengthening of ductile Cr<sub>15</sub>Fe<sub>20</sub>Co<sub>35</sub>Ni<sub>20</sub>Mo<sub>10</sub> alloys. *Scripta Mater* **137**, 88-93 (2017).
- 54 Liu, L. *et al.* Microstructure and the properties of FeCoCuNiSn<sub>x</sub> high entropy alloys. *Mater Sci Eng A* **548**, 64-68 (2012).

- 55 Liu, L. *et al.* Microstructure and tensile properties of FeMnNiCuCoSn<sub>x</sub> high entropy alloys. *Mater Design* **44**, 223-227 (2013).
- 56 Wu, Y. D. *et al.* A refractory Hf<sub>25</sub>Nb<sub>25</sub>Ti<sub>25</sub>Zr<sub>25</sub> high-entropy alloy with excellent structural stability and tensile properties. *Mater Lett* **130**, 277-280 (2014).
- 57 Huang, H. *et al.* Phase-Transformation Ductilization of Brittle High-Entropy Alloys via Metastability Engineering. *Adv Mater* (2017).
- 58 Dirras, G. *et al.* Elastic and plastic properties of as-cast equimolar TiHfZrTaNb high-entropy alloy. *Mater Sci Eng A* **654**, 30-38 (2016).
- 59 Senkov, O. N. & Semiatin, S. L. Microstructure and properties of a refractory high-entropy alloy after cold working. *J Alloy Compd* **649**, 1110-1123 (2015).
- 60 Sheikh, S. *et al.* Alloy design for intrinsically ductile refractory high-entropy alloys. *J Appl Phys* **120**, 164902 (2016).
- 61 Lilensten, L. *et al.* Design and tensile properties of a bcc Ti-rich high-entropy alloy with transformation-induced plasticity. *Materials Research Letters* **5**, 110-116 (2016).
